# Supplementary material for: Cationic porous organic polymers as an excellent platform for highly efficient removal of pollutants from water
Source: Royal Society of Chemistry journal article supplement (doi:10.1039/c8ta09145e), 2018-01-01
Supplement: c8ta09145e1.pdf [file c8ta09145e1.pdf]

*[Electronic Supplementary Information]*

**Cationic porous organic polymers as an excellent platform for highly efficient removal  
of pollutants from water**

Xiaochen Shen,<sup>a</sup> Si Ma,<sup>a</sup> Hong Xia<sup>\*,b</sup>, Zhan Shi,<sup>c</sup> Ying Mu,<sup>a</sup> and Xiaoming Liu<sup>\*a</sup>

<sup>a</sup> State Key Laboratory for Supramolecular Structure and Materials, College of Chemistry, Jilin University, Changchun, 130012, P.R. China.

<sup>b</sup> State Key Laboratory on Integrated Optoelectronics, College of Electronic Science and Technology, Jilin University, Changchun 130012, P.R. China.

<sup>c</sup> State Key Laboratory of Inorganic Synthesis and Preparative Chemistry, Jilin University, Changchun, 130012, P.R. China.

\*Email: xm\_liu@jlu.edu.cn; hxia@jlu.edu.cn

**Table of Content**

**Section 1.** General Procedures

**Section 2.** Materials and Syntheses of Monomer and Polymer

**Section 3.** IR Spectra

**Section 4.** Solid State <sup>13</sup>C CP/MAS NMR

**Section 5.** PXRD Spectrum

**Section 6.** TGA Curve

**Section 7.** XPS Spectra

**Section 8.** IR and <sup>13</sup>C NMR Spectra

**Section 9.** UV-vis Absorption Spectra

**Section 10.** Sorption Kinetics

**Section 11.** Adsorption Isotherm Models

**Section 12.** UV-vis Absorption Spectra

**Section 13.** IR Spectra

**Section 14.** Adsorption Capacity

## Section 15. Reference

### Section 1. General Procedures

$^1\text{H}$  spectra were recorded on a Avance III-400 NMR spectrometer, where chemical shifts ( $\delta$  in ppm) were determined with a residual proton of the solvent as standard. Solid-state  $^{13}\text{C}$  CP/MAS NMR measurement was recorded using a Bruker AVANCE III 400 WB spectrometer at a MAS rate of 5 kHz and a CP contact time of 2 ms. Elemental analyses were carried out on an Elementar model vario EL cube analyzer. The infrared spectra were recorded from 400 to 4000  $\text{cm}^{-1}$  on an Avatar FT-IR 360 spectrometer by using KBr pellets. UV/Vis spectra have been carried out on a Perkin Elmer Lambda 950 spectrophotometer within the wavelength range 200–700 nm. Field emission scanning electron microscopy was performed on a SU8020 model HITACHI microscope. Transmission electron microscopy was performed on a JEOL model JEM-2100 microscope. The sample was prepared by drop-casting a supersonic methanol suspension of polymer onto a copper grid. Powder X-ray diffraction data were recorded on a PANalytical BV Empyrean diffractometer diffractometer by depositing powder on glass substrate, from  $2\theta = 1.5^\circ$  to  $40^\circ$  with  $0.02^\circ$  increment at  $25^\circ\text{C}$ . Thermogravimetric analysis (TGA) was performed on a TA Q500 thermogravimeter by measuring the weight loss while heating at a rate of  $10^\circ\text{C min}^{-1}$  from room temperature to  $800^\circ\text{C}$  under nitrogen. Nitrogen sorption isotherms were measured at 77 K with a JW-BK 132F analyzer. Before measurement, the samples were degassed in vacuum at  $120^\circ\text{C}$  for more than 10 h. The Brunauer-Emmett-Teller (BET) method was utilized to calculate the specific surface areas and pore volume. X-Ray photoelectron spectroscopy (XPS) was measured with an ESCALAB 250 spectrometer (Thermo Scientific, Waltham, MA) with monochromatic Al  $K\alpha$  radiation (1486.6 eV).

## Section 2. Materials and Synthesis

**Materials:** The reactants used in the experiment were purchased from Energy Chemical unless otherwise stated. Deuterated solvents and n-Butyllithium solution in hexanes (1.6 M) were obtained from J&K Scientific. Formaldehyde dimethyl acetal (FDA), anhydrous  $\text{FeCl}_3$  and 1,2-dichloroethane (DCE) were obtained from Aladdin. Other organic solvents for reactions were distilled over appropriate drying reagents under nitrogen. 4,5-dihydro-3H-dinaphtho [2,1-c:1',2'-e] azepine and 3,3'-bis (2-naphthyl)-2,2'-bis (bromomethyl)-1,1'-binaphthyl were prepared according to the literature procedure.<sup>[1]</sup>

### Synthesis of monomer C-NSA<sub>Naph</sub>@Br:<sup>[2]</sup>

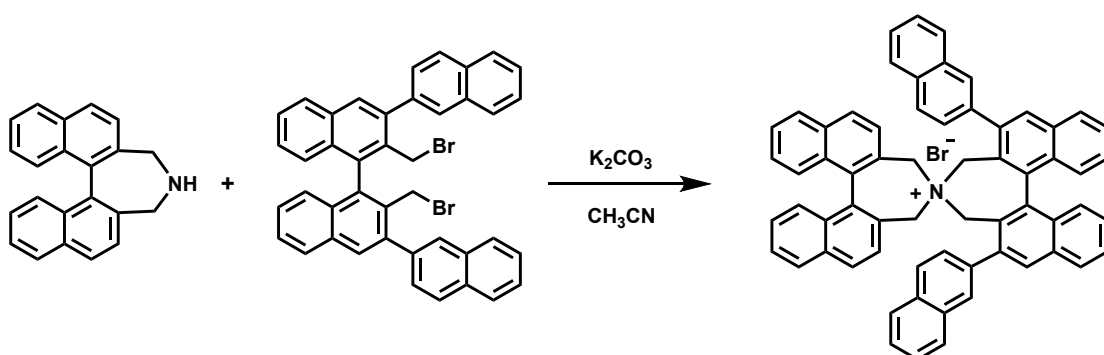

A mixture of 4,5-dihydro-3H-dinaphtho [2,1-c:1',2'-e]azepine (148 mg, 0.5 mmol), 3,3'-bis(2-naphthyl)-2,2'-bis(bromomethyl)-1,1'-binaphthyl (381 mg, 0.55 mmol) and  $\text{K}_2\text{CO}_3$  (104 mg, 0.75 mmol) in dry acetonitrile (5.0 mL) was heated to reflux, and stirring was maintained for 10 h. The resulting mixture

was poured into water and extracted with  $\text{CH}_2\text{Cl}_2$ . The organic extracts were dried over  $\text{Na}_2\text{SO}_4$  and concentrated. The residue was purified by column chromatography on silica gel ( $\text{MeOH}/\text{CH}_2\text{Cl}_2 = 1:30$ ) to furnish monomer  $\text{C-NSA}_{\text{Naph}}\text{@Br}$  (345 mg, 0.38 mmol, 76% yield).  $^1\text{H}$  NMR (400 MHz,  $\text{CDCl}_3$ ):  $\delta$  8.47 (s, 3H, Ar-H), 8.13 (d, 5H,  $J = 8.0$  Hz, Ar-H), 7.77 (t, 4H,  $J = 12.0$  Hz, Np), 7.64 (t, 4H,  $J = 16.0$  Hz, Ar-H), 7.31-7.40 (m, 8H, Np), 7.18 (d, 2H,  $J = 8.0$  Hz, Ar-H), 7.07 (t, 2H,  $J = 16.0$  Hz, Ar-H), 6.93 (d, 2H,  $J = 8.0$  Hz, Ar-H), 6.01 (br, 4H, Np), 5.01 (br, 2H, Ar- $\text{CH}_2$ ), 4.42 (d, 2H,  $J = 16.0$  Hz, Ar- $\text{CH}_2$ ), 4.15 (d, 2H,  $J = 12.0$  Hz, Ar- $\text{CH}_2$ ), 3.60 (d, 2H,  $J = 12.0$  Hz, Ar- $\text{CH}_2$ ) ppm;  $^{13}\text{C}$  NMR (100 MHz,  $\text{CDCl}_3$ ):  $\delta$  139.7, 139.6, 136.2, 134.3, 134.0, 133.5, 133.1, 131.0, 129.1, 128.9, 128.8, 128.7, 128.6, 128.3, 128.1, 127.9, 127.8, 127.7, 127.6, 127.5, 127.1, 126.9, 125.0, 123.1, 62.5, 57.8 ppm.

#### Synthesis of cationic organic porous polymer $\text{C-NSA}_{\text{Naph}}\text{-HCP@Br}$ :

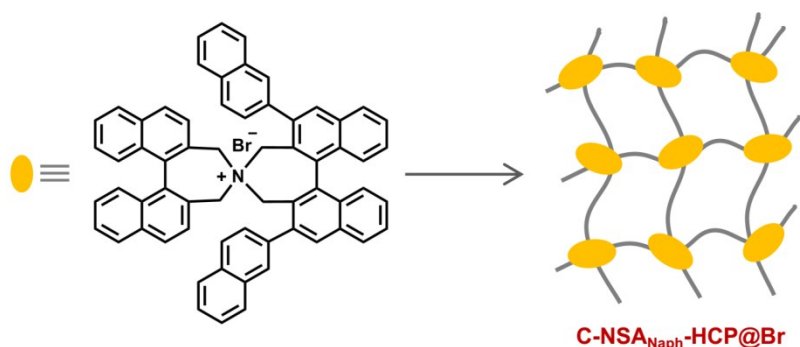

To the mixture of monomer  $\text{C-NSA}_{\text{Naph}}\text{@Br}$  (55.0 mg, 0.06 mmol) and anhydrous  $\text{FeCl}_3$  (77.9 mg, 0.48 mmol) in 1,2-dichloroethane (2.0 mL), FDA (42.5  $\mu\text{L}$ , 0.48 mmol) was added at room temperature. The mixture was heated to 80  $^\circ\text{C}$  and stirred for 24 h under a nitrogen atmosphere. The mixture was then cooled to room temperature, the precipitated network was filtered and washed with dichloromethane (10 mL  $\times$  3), methanol (10 mL  $\times$  3), and tetrahydrofuran (10 mL  $\times$  3), respectively. The product was then dispersed in 5 mL 1:1  $\text{H}_2\text{O}$ /Methanol saturated solution of sodium bromide. After the mixture was stirred for 24 h at room temperature, the residue was filtered. Repeated the above step three times, the precipitate was washed with plenty of water. The further purification of the network was carried out by Soxhlet extraction from methanol and tetrahydrofuran for 24 h, respectively. The product was dried in vacuum for 24 h at 80  $^\circ\text{C}$  to give a brown powder  $\text{C-NSA}_{\text{Naph}}\text{-HCP@Br}$  (59.1 mg,

96.7% yield).

### **Section 3. IR Spectra**

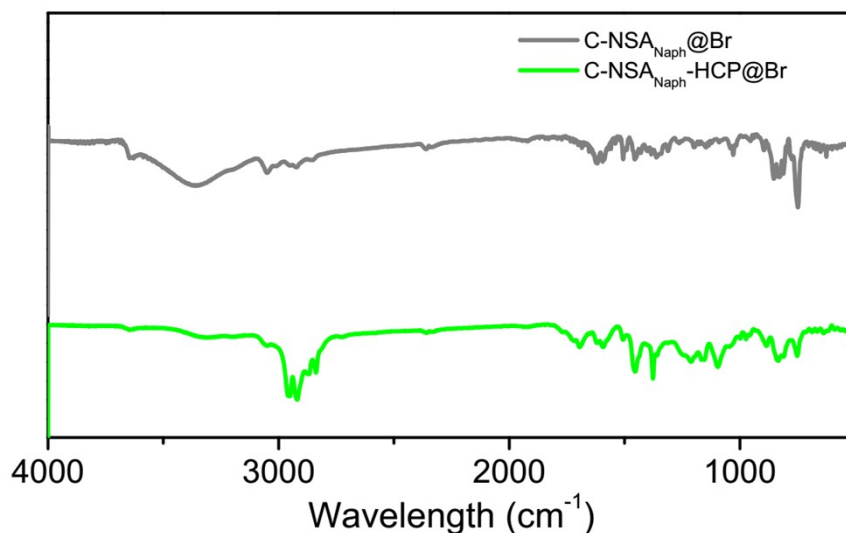

**Figure S1.** FT-IR spectra of N-spiroammonium salt monomers (C-NSA<sub>Naph</sub>@Br) and its polymer (C-NSA<sub>Naph</sub>-HCP@Br). The peaks at around 2930 cm<sup>-1</sup> are originating from C-H stretching vibrations of -CH<sub>2</sub>- groups.

#### Section 4. Solid State <sup>13</sup>C CP/MAS NMR

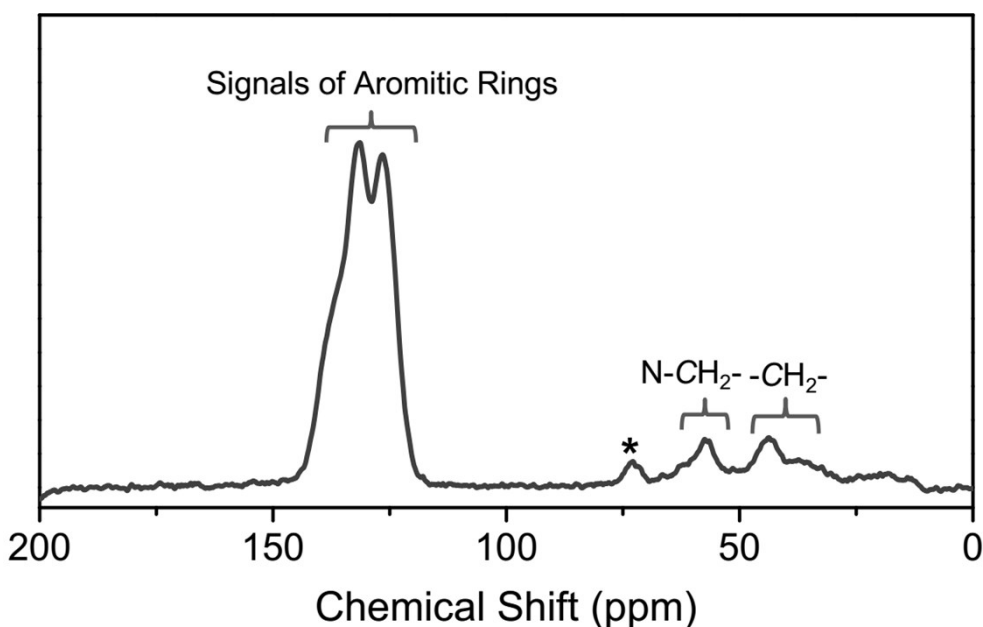

**Figure S2.** The solid-state <sup>13</sup>C-CP/MAS NMR spectrum of cationic porous organic polymer C-NSA<sub>Naph</sub>-HCP@Br. The signals from 120 to 145 ppm are assignable to aromatic carbon, and the weak peaks at about 58 and 42 ppm are attributed to the two types of methylene carbon in the polymer network.

Signal with \* symbol is attributed to the carbon of -OCH<sub>2</sub>- group in the polymer.<sup>[3]</sup>

### Section 5. PXRD Spectrum

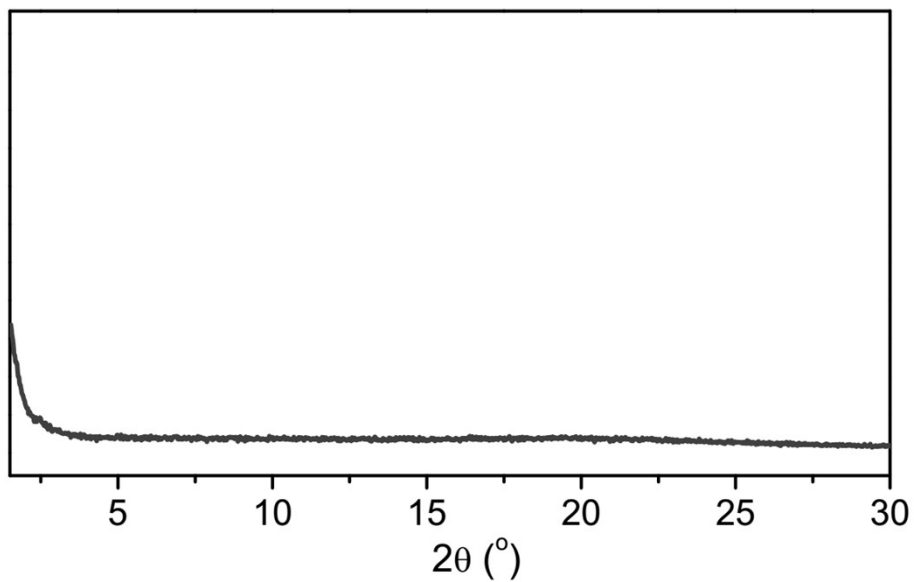

**Figure S3.** PXRD curve of cationic porous organic polymer C-NSA<sub>Naph</sub>-HCP@Br.

### Section 6. TGA Curve

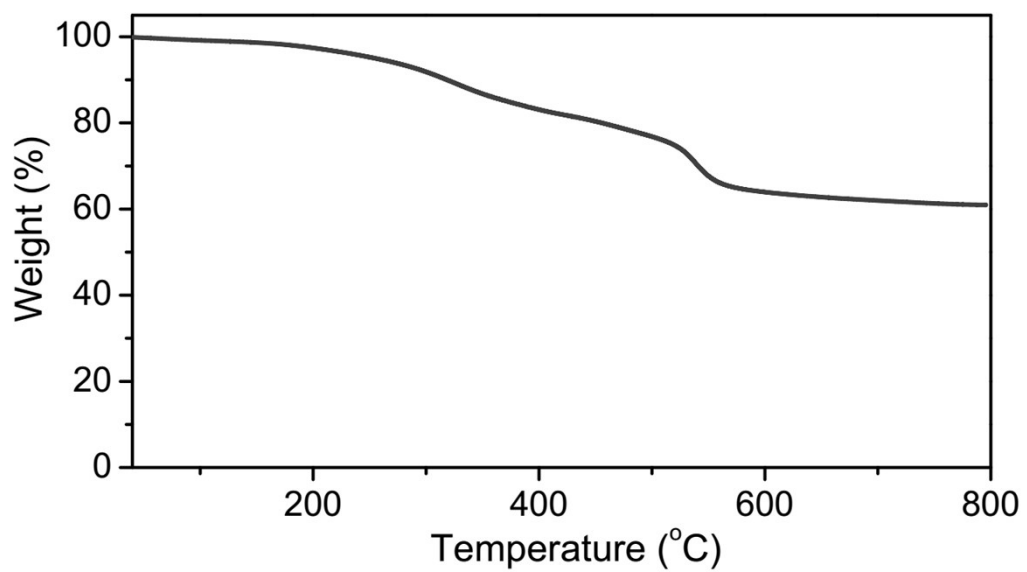

**Figure S4.** TGA curve of the cationic porous organic polymer C-NSA<sub>Naph</sub>-HCP@Br.

## Section 7. XPS Spectra



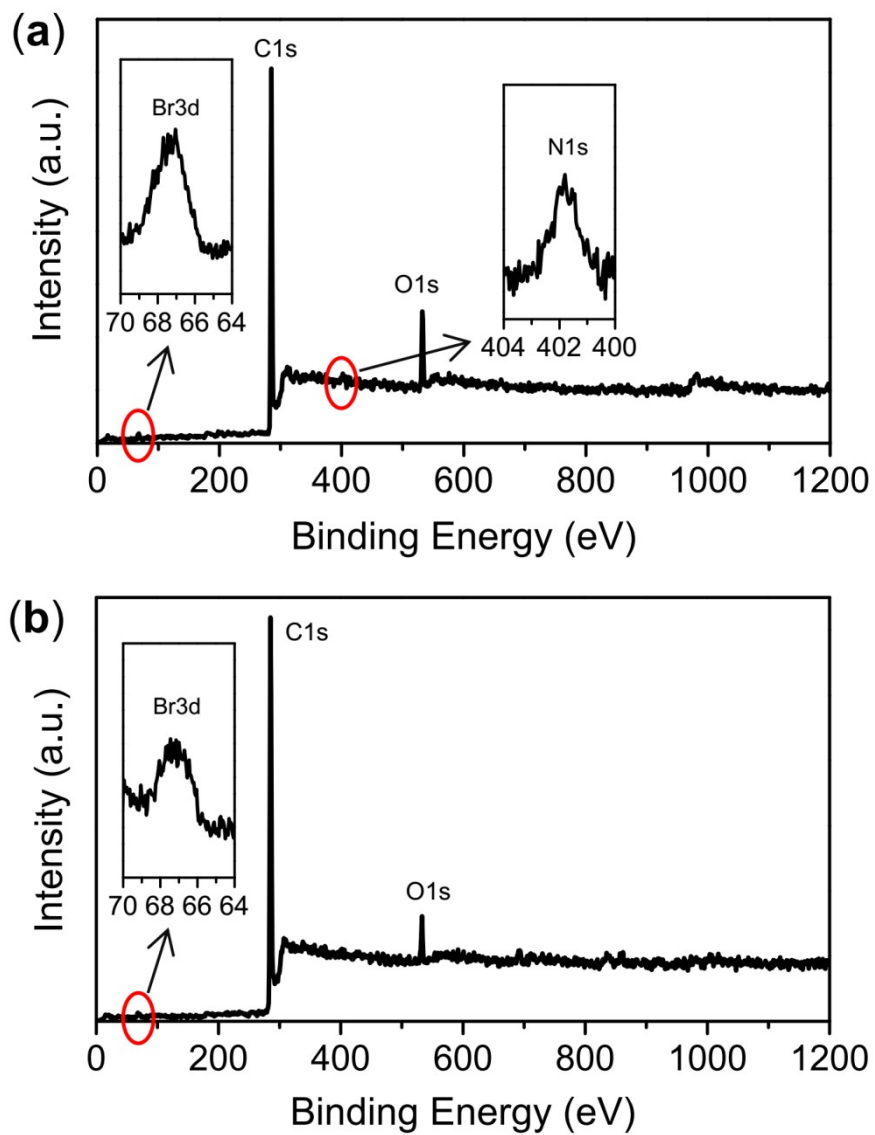

**Figure S5.** XPS patterns of C-NSA<sub>Naph</sub>@Br (a) and C-NSA<sub>Naph</sub>-HCP@Br (b) recorded from 0 to 1200 eV.

## Section 8. IR Spectra

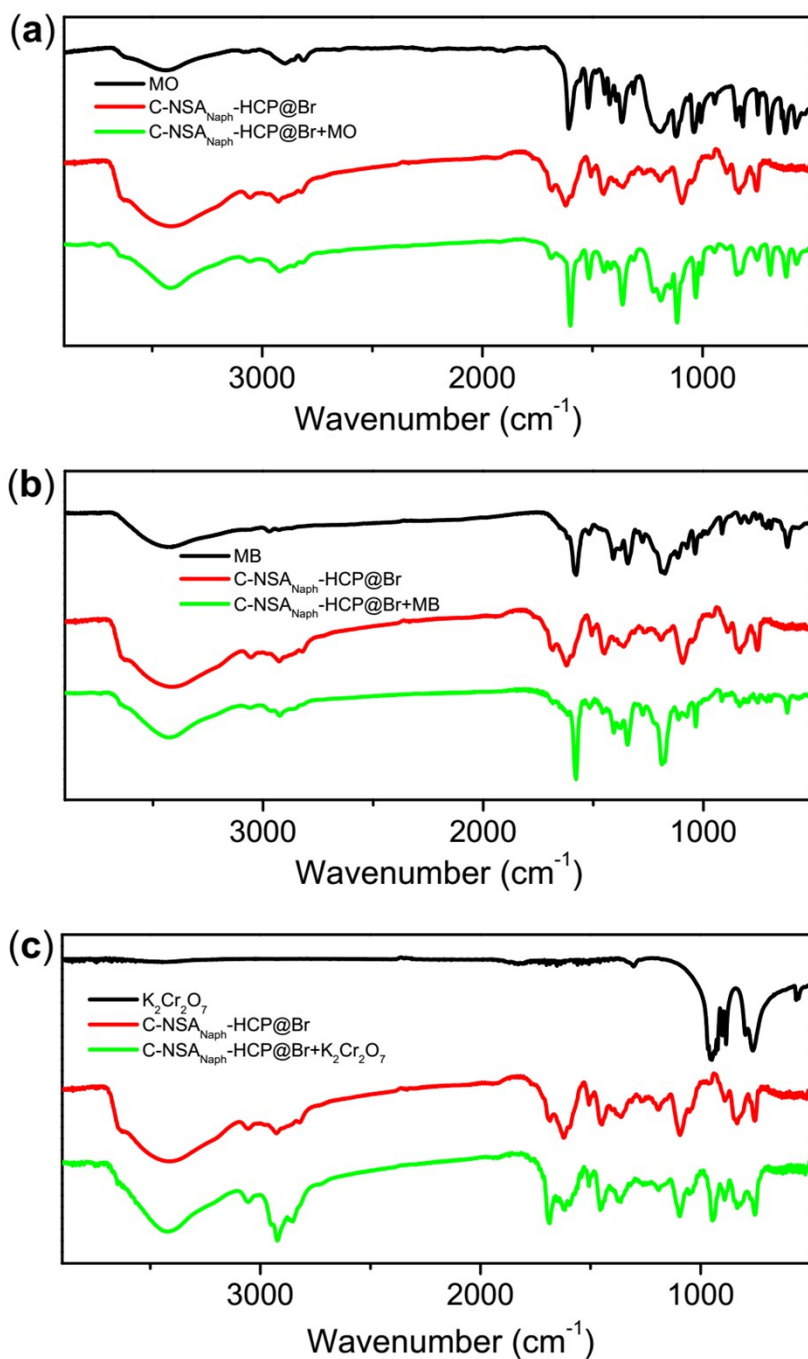

**Figure S6.** FT-IR spectra of pollutant, C-NSA<sub>Naph</sub>-HCP@Br, and C-NSA<sub>Naph</sub>-HCP@Br/pollutant.

## Section 9. UV-vis Absorption Spectra

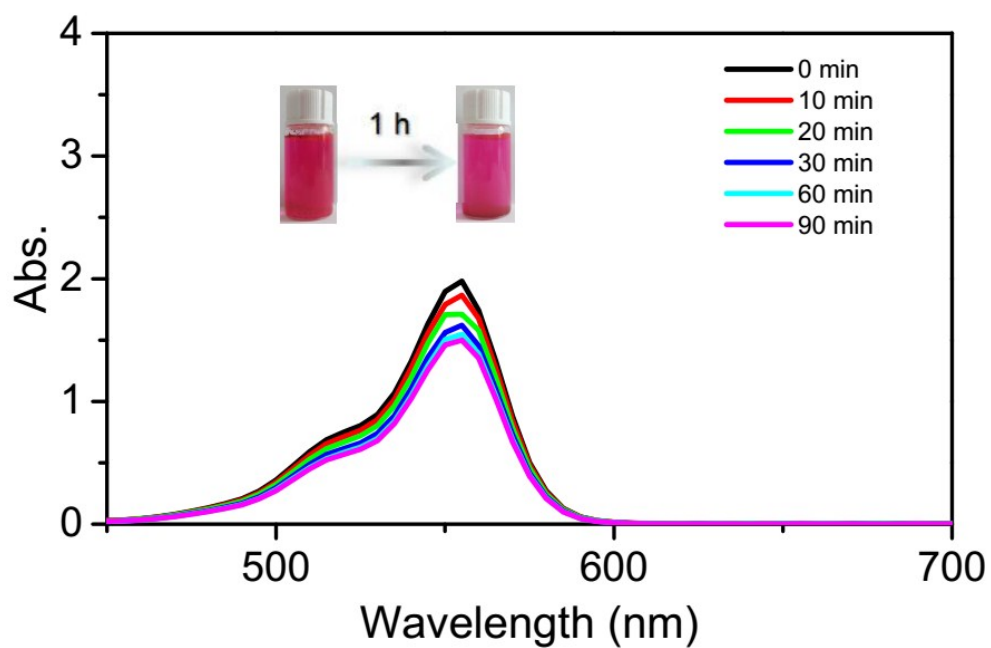

**Figure S7.** UV-vis absorption spectra of RB in water ( $c = 60 \text{ mg L}^{-1}$ ) at different times using C-NSA<sub>Naph</sub><sup>-</sup>HCP@Br (5.0 mg) as sorbent. The inset profiles display the change in color before and after adsorption.

## Section 10. Sorption Kinetics

**Table S1.** A summary of the pseudo-second-order rate constant  $k_2$  for different adsorption materials.<sup>a</sup>

| Adsorbent                                          | Mass<br>(mg) | Methyl orange           |           | $k_2$<br>(g mg <sup>-1</sup> min <sup>-1</sup> ) | Reference                                                 |
|----------------------------------------------------|--------------|-------------------------|-----------|--------------------------------------------------|-----------------------------------------------------------|
|                                                    |              | C (mg L <sup>-1</sup> ) | V (mL)    |                                                  |                                                           |
| Si/Al-Fe                                           | 30           | 150                     | 20        | $1.70 \times 10^{-3}$                            | <i>Appl. Surf. Sci.</i> <b>2013</b> , 280, 726.           |
| MWCNTs                                             | 15           | 40                      | 50        | $2.31 \times 10^{-3}$                            | <i>Chem. Eng. J.</i> <b>2011</b> , 170, 82.               |
| PAC-HNO <sub>3</sub>                               | 100          | 500                     | 50        | $5.17 \times 10^{-4}$                            | <i>Chemosphere</i> <b>2011</b> , 85, 1269.                |
| HJ-1                                               | 50           | 100                     | 20        | $1.82 \times 10^{-5}$                            | <i>Colloids Surf. A</i> <b>2008</b> , 330, 55.            |
| Zn/Al-LDO                                          | 5            | 50                      | 10        | $4.49 \times 10^{-4}$                            | <i>J. Colloid Interface Sci.</i> <b>2007</b> , 316, 284.  |
| PED-MIL-101                                        | 50           | 50                      | 25        | $3.04 \times 10^{-3}$                            | <i>J. Hazard. Mater.</i> <b>2010</b> , 181, 535.          |
| MOF-235                                            | 5            | 40                      | 50        | $9.10 \times 10^{-4}$                            | <i>J. Hazard. Mater.</i> <b>2011</b> , 185, 507.          |
| CNTs-A                                             | 30           | 150                     | 40        | $2.00 \times 10^{-3}$                            | <i>ACS Appl. Mater. Interfaces</i> <b>2012</b> , 4, 5749. |
| AHCP-1                                             | 5            | 20                      | 5         | $1.07 \times 10^{-3}$                            | <i>Polym. Chem.</i> <b>2018</b> , Advance Article.        |
| CMK-3                                              | 50           | 50                      | 25        | $4 \times 10^{-3}$                               | <i>J. Colloid Interface Sci.</i> <b>2011</b> , 362, 457.  |
| GO-CTS bead                                        | 5            | 30                      | 10        | $8 \times 10^{-4}$                               | <i>ACS Appl. Mater. Interfaces</i> 2015, 7, 14439.        |
| <b>C-NSA<sub>Naph<sup>-</sup></sub><br/>HCP@Br</b> | <b>5</b>     | <b>60</b>               | <b>15</b> | <b><math>3.70 \times 10^{-3}</math></b>          | <b><i>This Work</i></b>                                   |

<sup>a</sup> Generally, the dye adsorption of adsorption materials conforms to the pseudo-second-order model. And we can evaluate the adsorption rate of different adsorbents through the value of pseudo-second-order rate constant  $k_2$  in the same experimental conditions. Therefore, we found that C-NSA<sub>Naph<sup>-</sup></sub>HCP@Br has a faster adsorption rate.

### **Pseudo first order kinetic model**

The linear form of pseudo first order kinetic model is expressed by the following equation:

$$\ln(Q_e - Q_t) = \ln Q_e - k_1 t$$

Where  $Q_t$  and  $Q_e$  are the amount of pollutants adsorbed at time  $t$  and equilibrium ( $\text{mg g}^{-1}$ ),  $k_1$  is the pseudo-first-order rate constant of adsorption process ( $\text{min}^{-1}$ ).

### **The pseudo-second-order model**

The linear form of pseudo second order kinetic model is expressed by the following equation:

$$\frac{t}{Q_t} = \frac{1}{k_2 Q_e^2} + \frac{t}{Q_e}$$

Where  $Q_t$  and  $Q_e$  are the amount of pollutants adsorbed at time  $t$  and equilibrium ( $\text{mg g}^{-1}$ ),  $k_2$  is the pseudo-second-order rate constant of adsorption process ( $\text{g mg}^{-1} \text{min}^{-1}$ ).

**Table S2.** Parameters of the different adsorption kinetic models extracted from experimental adsorption data for C-NSA<sub>Naph</sub>-HCP@Br.

| Pollutants                                    | Pseudo-first-order         |                             |       | Pseudo-second-order                           |                             |       |
|-----------------------------------------------|----------------------------|-----------------------------|-------|-----------------------------------------------|-----------------------------|-------|
|                                               | $k_1$ (min <sup>-1</sup> ) | $Q_e$ (mg g <sup>-1</sup> ) | $R^2$ | $k_2$ (g mg <sup>-1</sup> min <sup>-1</sup> ) | $Q_e$ (mg g <sup>-1</sup> ) | $R^2$ |
| MO                                            | 0.02576                    | 55.20                       | 0.844 | $3.70 \times 10^{-3}$                         | 121.51                      | 0.999 |
| MB                                            | 0.02973                    | 64.45                       | 0.940 | $2.47 \times 10^{-3}$                         | 116.69                      | 0.998 |
| RB                                            | 0.03046                    | 23.77                       | 0.987 | $4.06 \times 10^{-3}$                         | 30.60                       | 0.991 |
| K <sub>2</sub> Cr <sub>2</sub> O <sub>7</sub> | 0.0264                     | 63.80                       | 0.990 | $2.62 \times 10^{-3}$                         | 119.05                      | 0.998 |

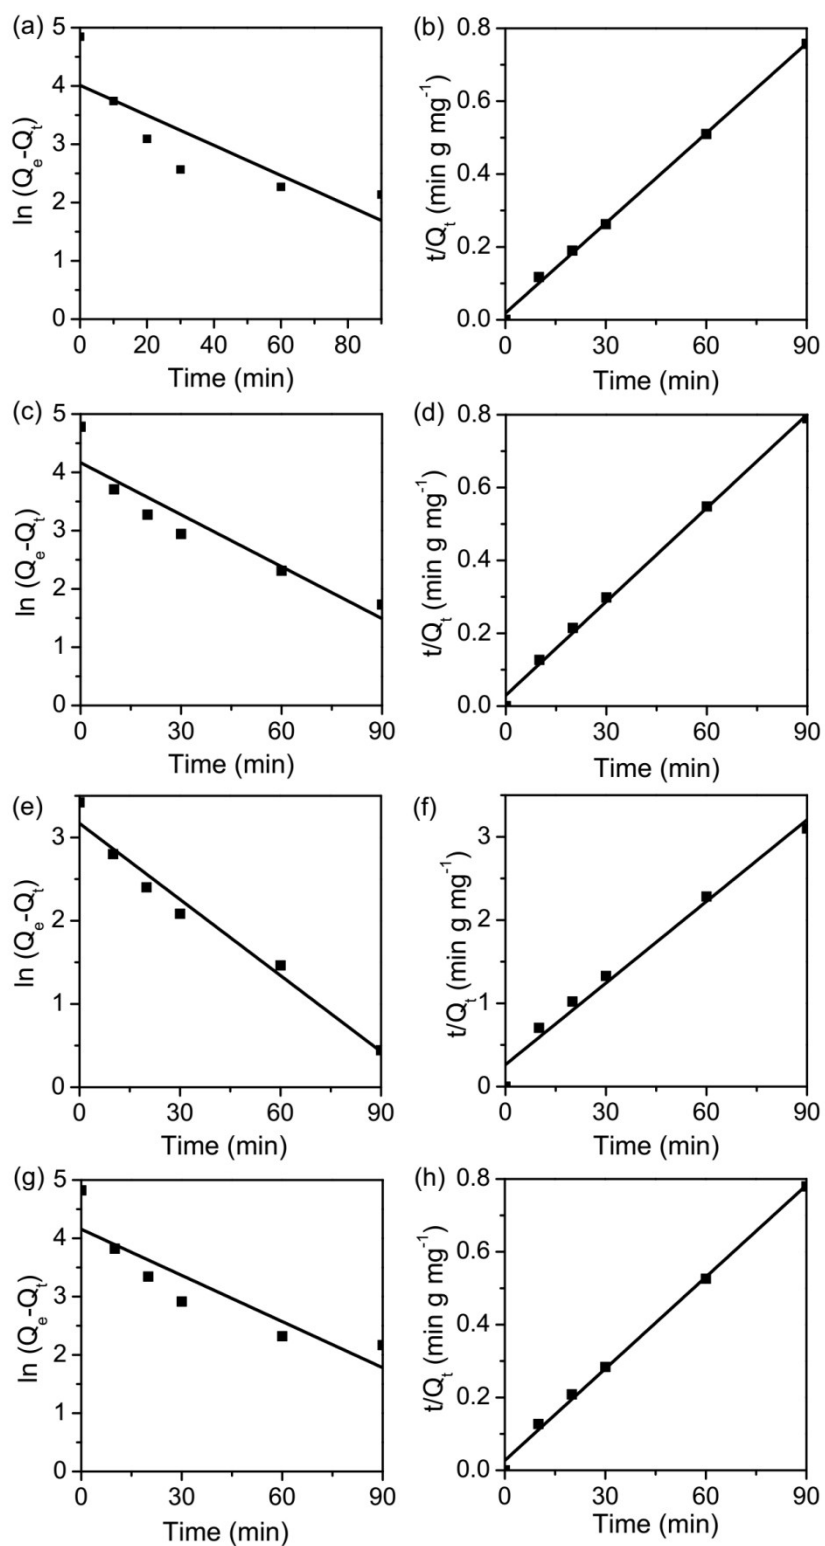

**Figure S8.** The pseudo-first-order model of MO (a), MB (c), RB (e), Cr<sub>2</sub>O<sub>7</sub><sup>2-</sup> (g) and the pseudo-second-order model of 60 mg L<sup>-1</sup> MO (b), MB (d), RB (f), K<sub>2</sub>Cr<sub>2</sub>O<sub>7</sub> (h). (C-NSANaph-HCP@Br, 5.0 mg; C = 60 mg L<sup>-1</sup>)

## Section 14. Adsorption Capacity

**Table S3.** Adsorption capacities of methyl orange for the reported MOFs and porous silicon materials under different pH.

| Adsorbent                                      | SA (m <sup>2</sup> g <sup>-1</sup> ) | Condition  |            |            |            | Reference                                           |
|------------------------------------------------|--------------------------------------|------------|------------|------------|------------|-----------------------------------------------------|
|                                                |                                      | pH=1       | pH=4       | pH=10      | pH=14      |                                                     |
| <b>C-NSA<sub>Naph</sub>-HCP@Br</b>             | <b>788</b>                           | <b>99%</b> | <b>99%</b> | <b>93%</b> | <b>86%</b> | <b><i>This Work</i></b>                             |
| <b><i>Metal-Organic Frameworks</i></b>         |                                      |            |            |            |            |                                                     |
| PED-MIL-101                                    | 3296                                 |            | 80%        |            |            | <i>J. Hazard. Mater.</i> <b>2010</b> , 181, 535.    |
| UiO-66                                         | 1276                                 |            | 90%        | 28%        |            | <i>Appl. Surf. Sci.</i> <b>2018</b> , 445, 424.     |
| NDA88-Cu                                       | 370                                  |            | 52%        | 68%        |            | <i>J. Clean. Prod.</i> <b>2018</b> , 184, 949.      |
| MFC-O                                          | 782                                  |            | 98%        | 25%        |            | <i>Chemoshere</i> <b>2018</b> , 199, 435.           |
| TPN/MNPs                                       | No description                       |            | 99%        | 89%        | 8%         | <i>J. Iranian Chem. Soc.</i> <b>2018</b> , 15, 733. |
| 55% SA-MIL-101                                 | 1387                                 |            | 97%        | 10%        |            | <i>RSC Adv.</i> <b>2018</b> , 8, 20517.             |
| [Cd(INA) <sub>2</sub> ·(H <sub>2</sub> O)].ISB | 384                                  |            | 17%        | 16%        |            | <i>J. Solid State Chem.</i> <b>2017</b> , 255, 157. |
| MOR-1-HA                                       | 1182                                 | 87%        | 96%        |            |            | <i>ChemPlusChem</i> <b>2017</b> , 82, 1188.         |
| MIL-68(Al)                                     | 1346                                 | destroy    | 98%        | 98%        | destroy    | <i>Water Sci. Technol.</i> <b>2017</b> , 75, 2800.  |



|                                 |                |     |      |      |     |                                                           |
|---------------------------------|----------------|-----|------|------|-----|-----------------------------------------------------------|
| PCN-222                         | 2336           |     | 43%  | 30%  |     | <i>RSC Adv.</i> <b>2017</b> , 7, 16273.                   |
| <b>Porous Silicons</b>          |                |     |      |      |     |                                                           |
| Si/Al-Fe                        | 243            | 32% | 70%  | 32%  | 13% | <i>Appl. Surf. Sci.</i> <b>2013</b> , 280, 726.           |
| SAPAS@MnNP                      | 85             | 32% | 75%  | 85%  |     | <i>J. Colloid Interface Sci.</i> <b>2016</b> , 483, 118.  |
| CPMO-OT                         | 10             |     | 85%  | 63%  |     | <i>J. Mater. Chem. A</i> <b>2016</b> , 4, 17866.          |
| Mg-Al LDH                       | No description |     | 98%  | 41%  |     | <i>J. Chem. Eng. Data</i> <b>2011</b> , 56, 4217.         |
| <b>Other Adsorbents</b>         |                |     |      |      |     |                                                           |
| TiO <sub>2</sub> @GAC           | No description | 96% | 87%  | 75%  |     | <i>Sci Rep.</i> <b>2018</b> , 8, 6463.                    |
| mesoporous TiO <sub>2</sub>     | 161            |     | 87 % | 78 % |     | <i>J. Hazard. Mater.</i> <b>2010</b> , 181, 204.          |
| CNTs-A                          | 535            |     | 81%  | 81%  |     | <i>ACS Appl. Mater. Interfaces</i> <b>2012</b> , 4, 5749. |
| NH <sub>2</sub> -MWCNTs         | 160            | 72% | 58%  | 26%  |     | <i>RSC Adv.</i> <b>2014</b> , 4, 55162.                   |
| Core-shell Cu@Cu <sub>2</sub> O | No description | 88% |      | <1 % |     | <i>Chem. Eng. J.</i> <b>2013</b> , 223, 76.               |
| H-δ-MnO <sub>2</sub>            | 92             |     | 34%  | 8%   |     | <i>J. Mater. Chem. A</i> <b>2015</b> , 3, 5674.           |

## Section 11. Adsorption isotherm models

**The Langmuir isotherm model:**

$$Q_e = \frac{Q_m k_L C_e}{1 + k_L C_e}$$

**The Freundlich isotherm model:**

$$Q_e = k_F C_e^{\frac{1}{n}}$$

Where  $k_L$  ( $\text{mg}^{-1}$ ) and  $Q_m$  ( $\text{mg g}^{-1}$ ) are the Langmuir isotherm constants;  $k_F$  ( $\text{mg}^{-1}$ ) and  $n$  are the Freundlich isotherm constants;  $C_e$  are the concentration at equilibrium ( $\text{mg L}^{-1}$ ),  $Q_e$  are the amount of fluoride adsorbed at equilibrium ( $\text{mg g}^{-1}$ ).

**Table S4.** Parameters of the different isotherm models extracted from experimental adsorption isotherms data for C-NSA<sub>Naph</sub>-HCP@Br.

| Pollutants | Langmuir isotherm            |                            |       | Freundlich isotherm        |      |       |
|------------|------------------------------|----------------------------|-------|----------------------------|------|-------|
|            | $Q_m$ ( $\text{mg g}^{-1}$ ) | $k_L$ ( $\text{mg}^{-1}$ ) | $R^2$ | $k_F$ ( $\text{mg}^{-1}$ ) | $n$  | $R^2$ |
| MO         | 1009.73                      | 0.25477                    | 0.990 | 388.79                     | 4.99 | 0.873 |
| MB         | 823.30                       | 0.07972                    | 0.995 | 233.03                     | 4.28 | 0.884 |
| RB         | 141.75                       | 0.01457                    | 0.937 | 23.92                      | 3.67 | 0.972 |

|              |        |        |       |        |      |       |
|--------------|--------|--------|-------|--------|------|-------|
| $K_2Cr_2O_7$ | 744.98 | 0.2053 | 0.985 | 302.00 | 5.73 | 0.890 |
|--------------|--------|--------|-------|--------|------|-------|

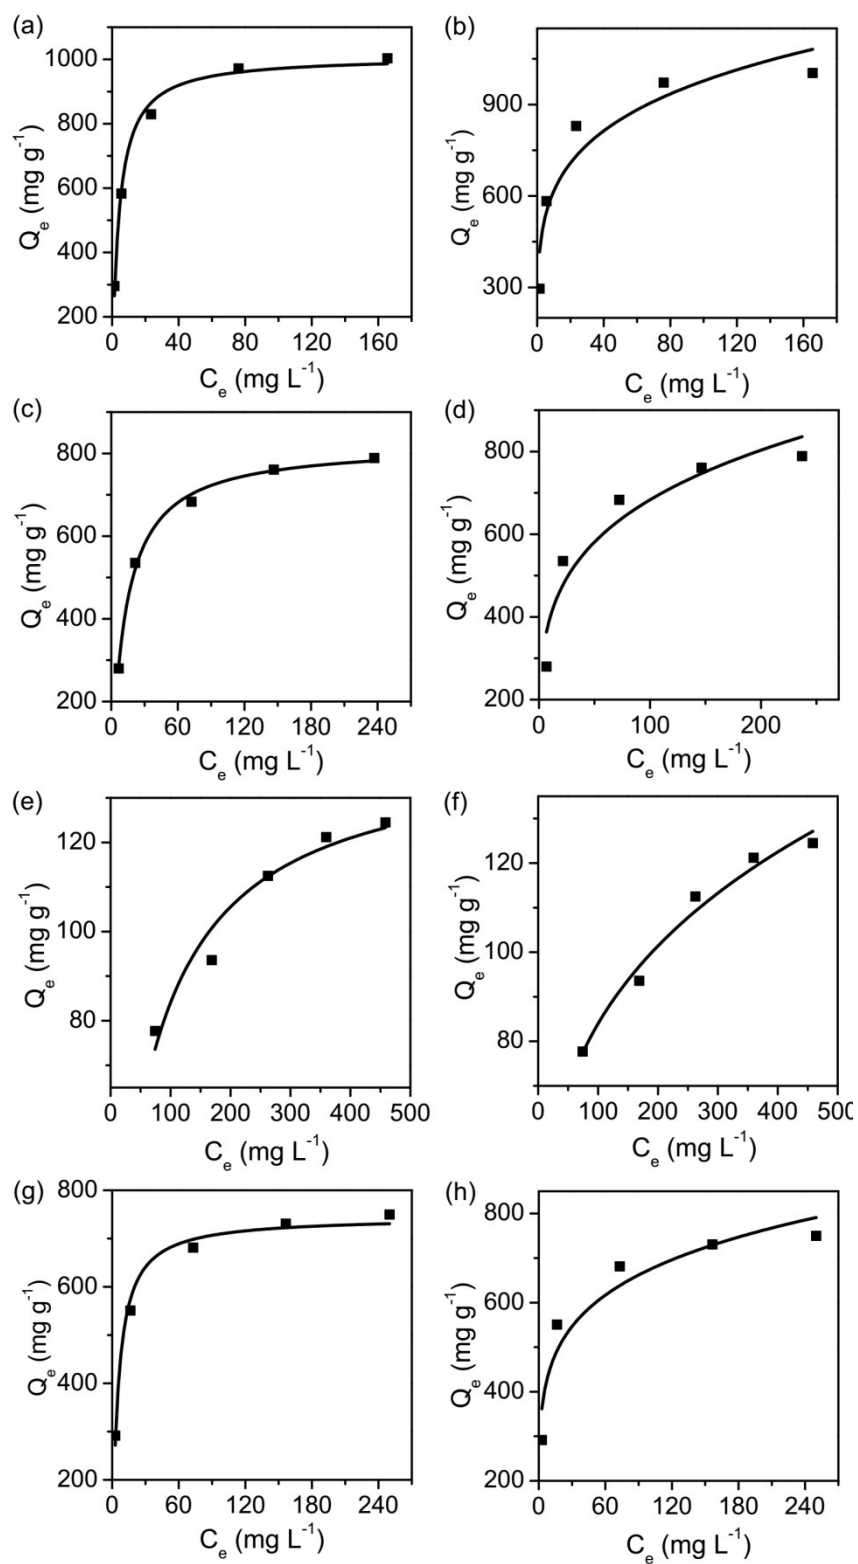

**Figure S9.** Adsorption isotherm of MO, MB, RB,  $\text{Cr}_2\text{O}_7^{2-}$  Langmuir line (a, c, e and g) and Freundlich line (b, d, f, and h) respectively.

## Section 12. UV-vis Absorption Spectra

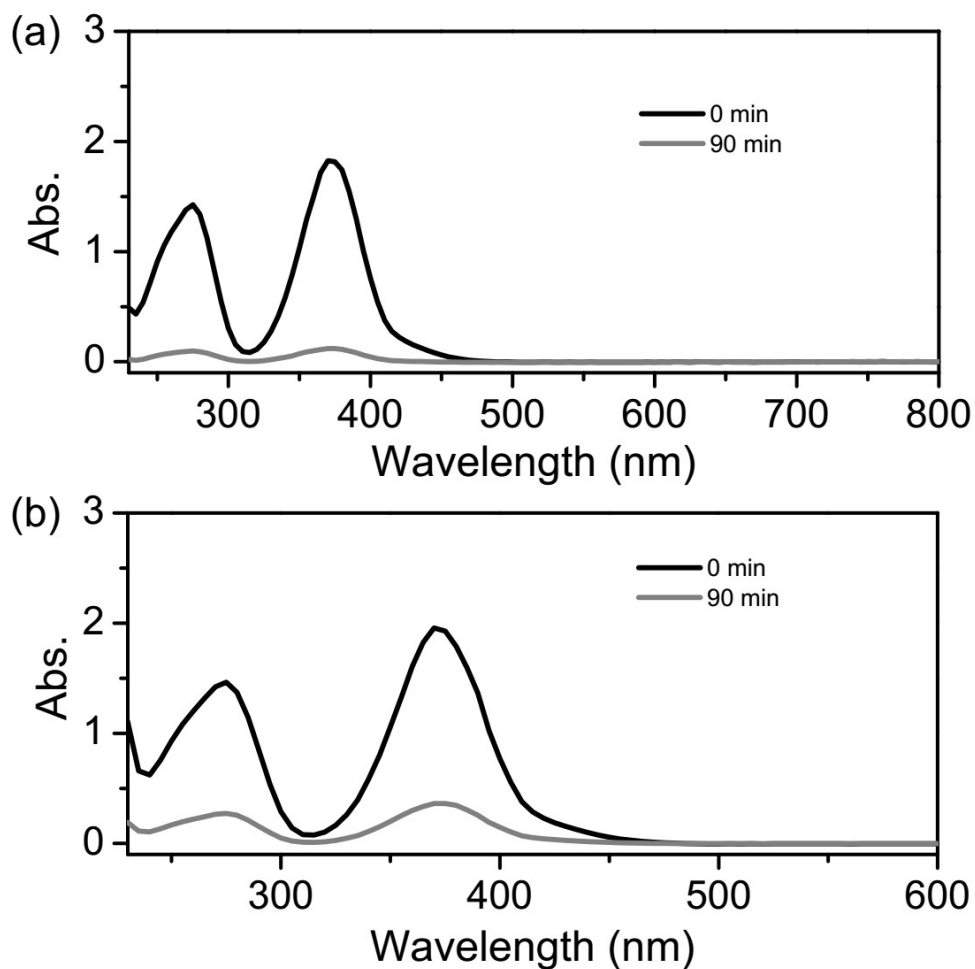

**Figure S10.** (a) Time-dependent UV-vis absorption spectra of  $\text{Cr}_2\text{O}_7^{2-}$  together with 1-fold of disturbing ions in the presence of  $\text{C-NSA}_{\text{Naph-HCP@Br}}$ . (b) Time-dependent UV-vis absorption spectra of  $\text{Cr}_2\text{O}_7^{2-}$  together with 5-fold of disturbing ions in the presence of  $\text{C-NSA}_{\text{Naph-HCP@Br}}$ .

### Section 13. IR and $^{13}\text{C}$ NMR Spectra

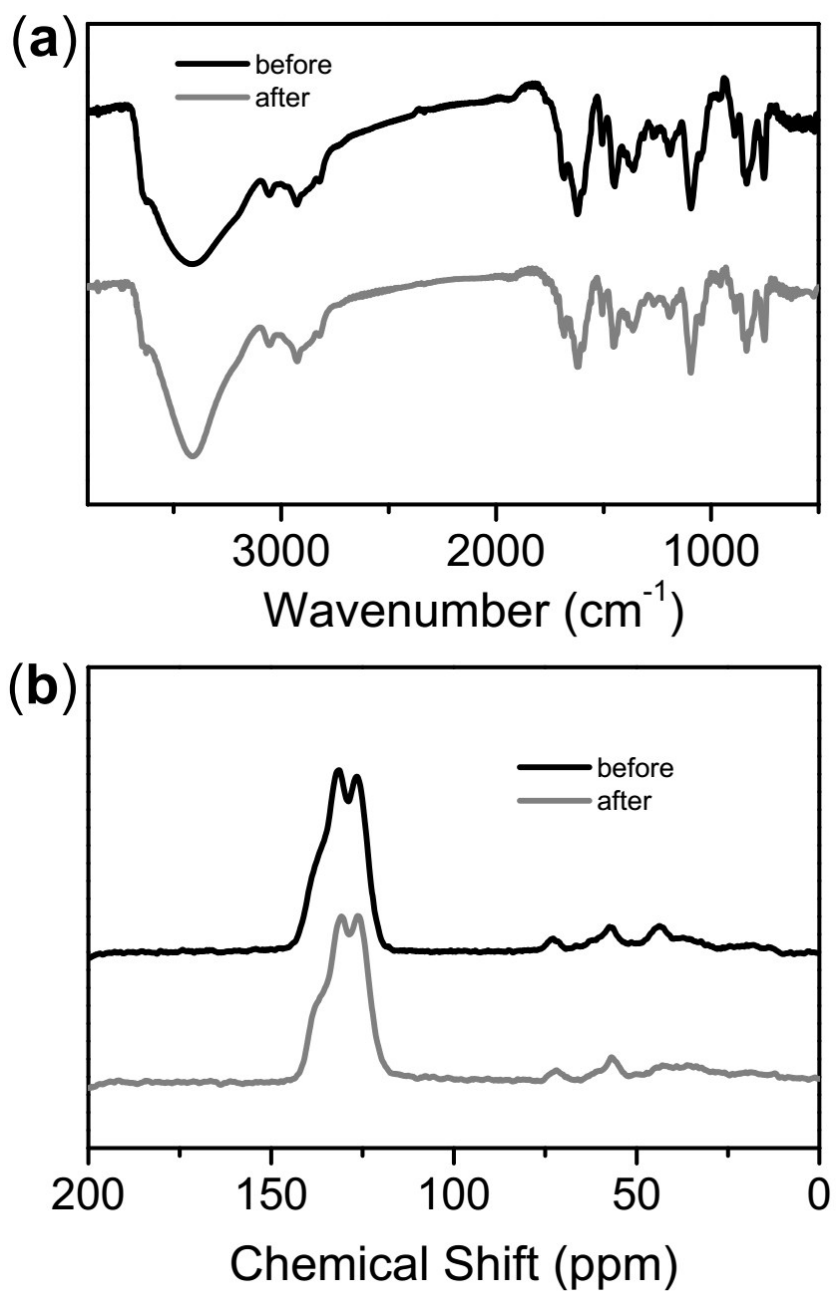

**Figure S11.** FT-IR spectra (a) and  $^{13}\text{C}$  CP/MAS NMR spectra (b) of C-NSA<sub>Naph</sub>-HCP@Br before (black line) and after the sixth run (gray line).

## Section 14. Adsorption Capacity

**Table S5.** Adsorption capacities of dichromate anion for the reported materials.

| Adsorbent                              | SA (m <sup>2</sup> g <sup>-1</sup> ) | Q <sub>max</sub> (mg g <sup>-1</sup> ) | Recycling      | Reference                                             |
|----------------------------------------|--------------------------------------|----------------------------------------|----------------|-------------------------------------------------------|
| <b><i>Metal-Organic Frameworks</i></b> |                                      |                                        |                |                                                       |
| FIR-54                                 | No description                       | 103                                    | 5              | <i>Chem. Mater.</i> <b>2015</b> , 27, 205.            |
| 1-Br                                   | No description                       | 128                                    | No description | <i>Chem. Commun.</i> <b>2017</b> , 53, 1860.          |
| TMU-3                                  | No description                       | 145                                    | No description | <i>Inorg. Chem.</i> <b>2016</b> , 55, 5507.           |
| 1-SO <sub>4</sub>                      | No description                       | 166                                    | No description | <i>Angew. Chem., Int. Ed.</i> <b>2016</b> , 55, 7811. |
| MOR-2                                  | 354                                  | 194                                    | 10             | <i>J. Mater. Chem. A</i> , <b>2017</b> , 5, 14707.    |
| SC-SC                                  | No description                       | 207                                    | No description | <i>Chem. Commun.</i> <b>2017</b> , 53, 9206.          |
| MONT-1                                 | No description                       | 212                                    | 5              | <i>RSC Adv.</i> <b>2016</b> , 6, 33888.               |
| ABT 2ClO <sub>4</sub>                  | No description                       | 214                                    | No description | <i>Angew. Chem. Int. Ed.</i> <b>2013</b> , 52, 13769. |
| MOR-1-HA                               | 1004                                 | 240                                    | No description | <i>Chem. Sci.</i> <b>2016</b> , 7, 2427.              |
| ZJU-101                                | 561                                  | 245                                    | No description | <i>Chem. Commun.</i> <b>2015</b> , 51, 14732.         |
| UiO-66-NH <sub>2</sub> @silica         | 730                                  | 277                                    | No description | <i>J. Mater. Chem. A</i> , <b>2018</b> , 6, 2742.     |

|                                                                                                        |                |            |                |                                                             |
|--------------------------------------------------------------------------------------------------------|----------------|------------|----------------|-------------------------------------------------------------|
| [Cu <sub>2</sub> L(H <sub>2</sub> O) <sub>2</sub> (NO <sub>3</sub> ) <sub>2</sub> ·5.5H <sub>2</sub> O | No description | 223        | No description | <i>Chem. Eur. J.</i> , <b>2018</b> , 24, 2718.              |
| <b>Porous Organic Polymers</b>                                                                         |                |            |                |                                                             |
| POP-Im1                                                                                                | negligible     | 172        | No description | <i>ACS Appl. Mater. Interfaces.</i> <b>2016</b> , 8, 18904. |
| PANI/H-TNBs                                                                                            | No description | 157        | 10             | <i>Polym. Chem.</i> <b>2016</b> , 7, 785.                   |
| DEX-Cr                                                                                                 | No description | 248        | No description | <i>Environ. Prog. Sus. Energy.</i> <b>2015</b> , 34, 387.   |
| <b>C-NSA<sub>Naph</sub>-HCP@Br</b>                                                                     | <b>788</b>     | <b>745</b> | <b>6</b>       | <b><i>This Work</i></b>                                     |
| <b>Activated Carbons</b>                                                                               |                |            |                |                                                             |
| ACF                                                                                                    | 1565           | 116        | No description | <i>Ind. Eng. Chem. Res.</i> <b>2005</b> , 44, 1027.         |
| PANI-Fe/OMC                                                                                            | 56             | 172        | No description | <i>RSC Adv.</i> , <b>2014</b> , 4, 58362.                   |
| Acticarbone                                                                                            | 1210           | 186        | No description | <i>J. Hazard. Mater.</i> <b>2005</b> , 123, 223.            |
| Fe/CMK-3                                                                                               | 679            | 257        | 7              | <i>Chem. Eng. J.</i> <b>2014</b> , 239, 114.                |
| Activated carbons (CKW)                                                                                | 1255           | 316        | No description | <i>J. Hazard. Mater.</i> <b>2005</b> , 123, 223.            |
| PAC                                                                                                    | 2402           | 390        | No description | <i>Water Res.</i> <b>1995</b> , 29, 2174.                   |
| Waste slurry                                                                                           | No description | 640        | 10             | <i>Water Res.</i> <b>1989</b> , 23, 1161.                   |
| <b>Mesoporous Silicons</b>                                                                             |                |            |                |                                                             |
| NN-sicilia                                                                                             | 55             | 119        | No description | <i>J. Colloid Interface Sci.</i> <b>2008</b> , 318, 309     |



|                                                |                |     |                |                                                    |
|------------------------------------------------|----------------|-----|----------------|----------------------------------------------------|
| NNN-SBA-1                                      | 126            | 211 | No description | <i>Chem. Mater.</i> <b>2002</b> , 14, 4603.        |
| <b><i>Other Adsorbents</i></b>                 |                |     |                |                                                    |
| Mesoporous TiO <sub>2</sub>                    | 161            | 34  | 5              | <i>J. Hazard. Mater.</i> <b>2010</b> , 181, 204.   |
| Bagasse fly ash                                | 440            | 259 | No description | <i>Environmentalist</i> , <b>1999</b> , 19, 129.   |
| biofilm on nZVI-C-A beads                      | No description | 474 | No description | <i>Ind. Eng. Chem. Res.</i> <b>2016</b> , 55, 5973 |
| Polyethyleneimine and graphene oxide composite | No description | 540 | 5              | <i>J. Mater. Chem. A.</i> <b>2014</b> , 2, 12561.  |

## Section 15. Reference

- [1] J. M. Hawkins, G. C. Fu, *J. Org. Chem.*, 1986, **51**, 2820.
- [2] T. Ooi, M. Kameda, K. Maruoka, *J. Am. Chem. Soc.*, 2003, **125**, 5139.
- [3] (a) X. Zhu, S. Mahurin, S. An, C. Do-Thanh, C. Tian, Y. Li, L. Gill, E. Hagaman, Z. Bian, J. Zhou, J. Hu, H. Liu, S. Dai, *Chem. Commun.*, 2014, **50**, 7933; (b) B. Li, R. Gong, W. Wang, X. Huang, W. Zhang, H. Li, C. Hu, B. Tan, *Macromolecules*, 2011, **44**, 2410.
